# Decoding the Information Structure Underlying the Neural Representation of Concepts

**Authors:** Leonardo Fernandino<sup>1,2\*</sup>, Jia-Qing Tong<sup>3</sup>, Lisa L. Conant<sup>1</sup>, Colin J. Humphries<sup>1</sup>,  
Jeffrey R. Binder<sup>1,3</sup>

**Affiliations:**

<sup>1</sup> Department of Neurology, Medical College of Wisconsin.

<sup>2</sup> Department of Biomedical Engineering, Medical College of Wisconsin

<sup>3</sup> Department of Biophysics, Medical College of Wisconsin.

\*Corresponding author: Leonardo Fernandino, Medical College of Wisconsin, 8701 W.  
Watertown Plank Rd., Milwaukee, WI, USA. Phone: 414-955-7388.

Email: lfernandino@mcw.edu.

**Competing interests statement:** Authors declare no competing interests.

**Keywords:**

Semantic memory; concept representation; lexical semantics; distributional semantics; embodied semantics; language processing; fMRI; representational similarity analysis.

## Abstract

The nature of the representational code underlying conceptual knowledge remains a major unsolved problem in cognitive neuroscience. We assessed the extent to which different representational systems contribute to the instantiation of lexical concepts in high-level, heteromodal cortical areas previously associated with semantic cognition. We found that lexical semantic information can be reliably decoded from a wide range of heteromodal cortical areas in frontal, parietal, and temporal cortex. In most of these areas, we found a striking advantage for experience-based representational structures (i.e., encoding information about sensory-motor, affective, and other features of phenomenal experience), with little evidence for independent taxonomic or distributional organization. These results were found independently for object and event concepts. Our findings indicate that concept representations in heteromodal cortex are based, at least in part, on experiential information. They also reveal that, in most heteromodal areas, event concepts have more heterogeneous representations (i.e., they are more easily decodable) than object concepts, and that other areas beyond the traditional “semantic hubs” contribute to semantic cognition, particularly the posterior cingulate gyrus and the precuneus.

## Introduction

The capacity for conceptual knowledge is arguably one of the most defining properties of human cognition, yet it is still unclear how concepts are represented in the brain. Recent developments in functional neuroimaging and computational linguistics have sparked renewed interest in elucidating the information structures and neural circuits underlying concept representation (1–5). Attempts to characterize the representational code for concepts typically involve information structures based on three qualitatively distinct types of information, namely, taxonomic, experiential, and distributional information. As the term implies, a taxonomic

1 information system relies on category membership and inter-category relations. Our tendency to  
2 organize objects, events and experiences into discrete categories has led most authors – dating  
3 back at least to Plato (6) – to take taxonomic structure as the central property of conceptual  
4 knowledge (7). The taxonomy for concepts is traditionally seen as a hierarchically structured  
5 network, with basic level categories (e.g. “apple”, “orange”) grouped into superordinate  
6 categories (e.g., “fruit”, “food”), and subdivided into subordinate categories (e.g., “Gala apple”,  
7 “tangerine”) (8). A prominent account in cognitive science maintains that such categories are  
8 represented in the mind/brain as purely symbolic entities, whose semantic content and usefulness  
9 derive primarily from how they relate to each other (9, 10). Such representations are seen as  
10 qualitatively distinct from the sensory-motor processes through which we interact with the  
11 world, much like the distinction between software and hardware in digital computers.

12 An “experiential” representational system, on the other hand, encodes information about the  
13 experiences that led to the formation of particular concepts. It is motivated by a view, often  
14 referred to as embodied, grounded, or situated semantics, in which concepts arise primarily from  
15 generalization over particular experiences, as information originating from the various modality-  
16 specific systems (e.g., visual, auditory, tactile, motor, affective, etc.) is combined and re-encoded  
17 into progressively more schematic representations that are stored in memory. Since, in this view,  
18 there is a degree of continuity between conceptual and modality-specific systems, concept  
19 representations are thought to reflect the structure of the perceptual, affective and motor  
20 processes involved in those experiences (11–14).

21 Finally, “distributional” information pertains to statistical patterns of co-occurrence between  
22 lexical concepts (i.e., concepts that are widely shared within a population and denoted by a single  
23 word) in natural language usage. As is now widely appreciated, these co-occurrence patterns

1 encode a substantial amount of information about word meaning (15–17). Although word co-  
2 occurrence patterns primarily encode contextual associations, such as those connecting the words  
3 “cow”, “barn”, and “farmer”, semantic similarity information is indirectly encoded, since words  
4 with similar meanings tend to appear in similar contexts (e.g., “cow” and “horse”, “pencil” and  
5 “pen”). This has led some authors to propose that concepts may be represented in the brain, at  
6 least in part, in terms of distributional information (15, 18).

7 Whether, and to what extent, each of these types of information plays a role in the neural  
8 representation of conceptual knowledge is a topic of intense research and debate. A large body of  
9 evidence has emerged from behavioral studies, functional neuroimaging experiments, and  
10 neuropsychological assessment of patients with semantic deficits, with results typically  
11 interpreted in terms of taxonomic (19–24), experiential (13, 25–34), or distributional (2, 3, 5, 35,  
12 36) accounts. However, the extent to which each of these representational systems plays a role in  
13 the neural representation of conceptual knowledge remains controversial (23, 37, 38), in part  
14 because their representations of common lexical concepts are strongly inter-correlated: patterns  
15 of word co-occurrence in natural language are driven in part by taxonomic and experiential  
16 similarities between the concepts to which they refer, and the taxonomy of natural categories is  
17 systematically related to the experiential attributes of the exemplars (39–41). Consequently, the  
18 empirical evidence currently available is unable to discriminate between these representational  
19 systems.

20 Several computational models of concept representation have been proposed based on these  
21 structures. While earlier models relied heavily on hierarchical taxonomic structure (42, 43), more  
22 recent proposals have emphasized the role of experiential and/or distributional information (34,  
23 44–46). The model by Chen and colleagues, for example, showed that graded taxonomic

1 structure can emerge from the statistical coherent covariation found across experiences and  
2 exemplars without explicitly coding such taxonomic information per se. Other models propose  
3 that concepts may be formed through the combination of experiential and distributional  
4 information (44, 46), suggesting a dual representational code akin to Paivio's dual coding theory  
5 (47).

6 We investigated the relative contribution of each representational system by deriving  
7 quantitative predictions from each system for the similarity structure of a large set of concepts  
8 and then using representational similarity analysis (RSA) with high-resolution functional MRI  
9 (fMRI) to evaluate those predictions. Unlike the more typical cognitive subtraction technique,  
10 RSA focuses on the information structure of the pattern of neural responses to a set of stimuli  
11 (48). For a given stimulus set (e.g., words), RSA assesses how well the representational  
12 similarity structure predicted by a model matches the neural similarity structure observed from  
13 fMRI activation patterns (Figure 1). This allowed us to directly compare, in quantitative terms,  
14 predictions derived from the three representational systems.

15

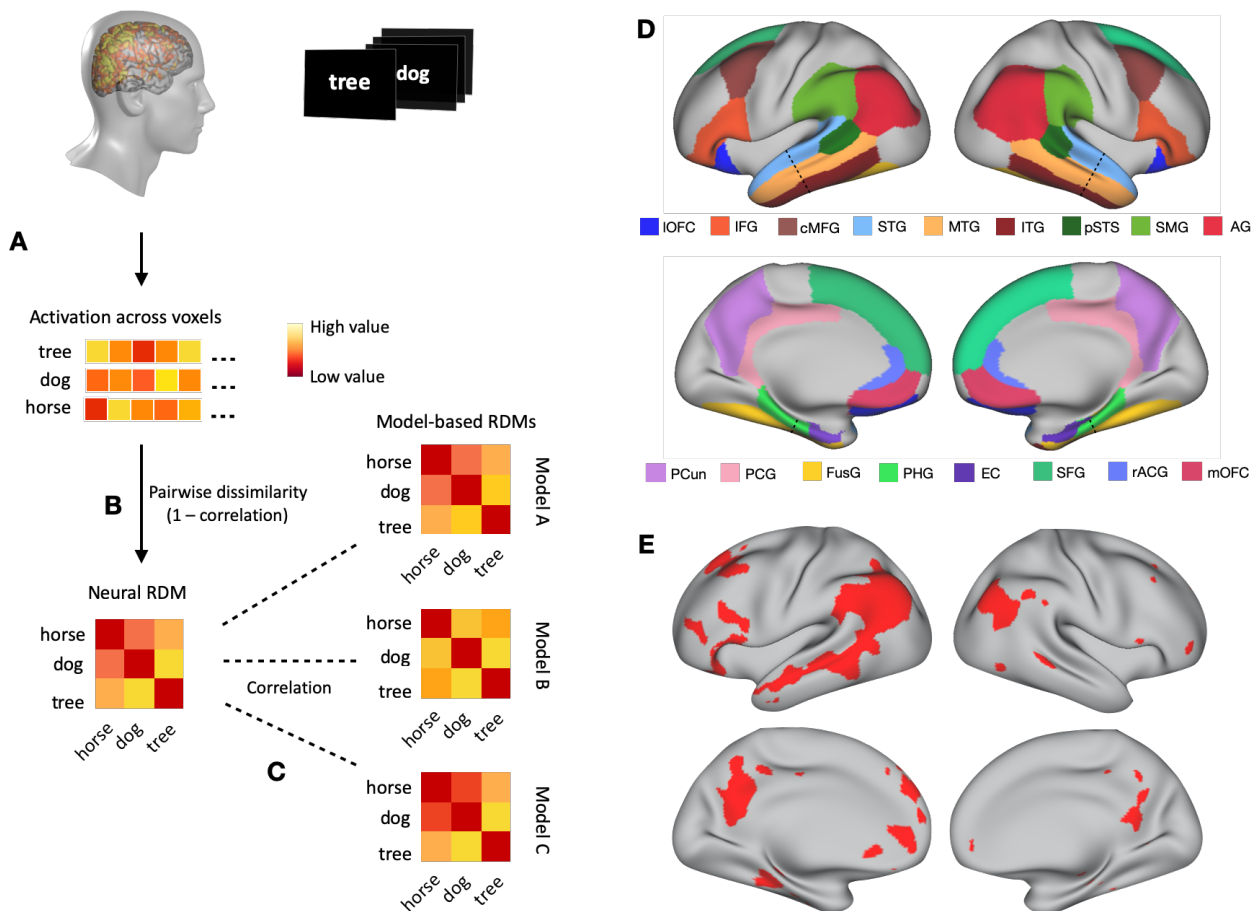

**Figure 1:** Representational similarity analysis. A. An fMRI activation map was generated for each concept presented in the study, and the activation across voxels was reshaped as a vector. B. The neural representational dissimilarity matrix (RDM) for the stimulus set was generated by computing the dissimilarity between these vectors (1 – correlation) for every pair of concepts. C. A model-based RDM was computed from each model, and the similarity between each model’s RDM and the neural RDM was evaluated via Spearman correlation. D. Anatomically defined ROIs. The dashed line indicates the boundary where temporal lobe ROIs were split into anterior and posterior portions (see main text for acronyms). E. Cortical areas included in the functionally defined semantic network ROI (49).

## 1       **Results**

2           In two experiments, participants made familiarity judgments on a large number of lexical  
3       concepts, selected from a broad range of taxonomic categories, while undergoing fMRI (see  
4       Materials and Methods section for details). Written nouns were presented, one at a time, on a  
5       computer screen, and participants rated each one according to how often they encountered the  
6       corresponding entity or event in their daily lives, on a scale from 1 (“rarely or never”) to 3  
7       (“often”). RSAs were conducted for a set of cortical areas previously associated with concept  
8       representation (49–51): angular gyrus (AG), supramarginal gyrus (SMG), temporal pole (TP),  
9       anterior superior temporal gyrus (aSTG), posterior superior temporal gyrus (pSTG), anterior  
10      middle temporal gyrus (aMTG), posterior middle temporal gyrus (pMTG), anterior inferior  
11      temporal gyrus (aITG), posterior inferior temporal gyrus (pITG), posterior superior temporal  
12      sulcus (pSTS), anterior parahippocampal gyrus (aPHG), posterior parahippocampal gyrus  
13      (pPHG), entorhinal cortex (EC), inferior frontal gyrus (IFG), caudal middle frontal gyrus  
14      (cMFG), superior frontal gyrus (SFG), precuneus (PCun), posterior cingulate gyrus (PCG),  
15      rostral anterior cingulate gyrus (rACG), medial orbitofrontal cortex (mOFC), lateral orbitofrontal  
16      cortex (lOFC) and fusiform gyrus (FusG). These regions were anatomically defined following  
17      the Desikan-Killiany probabilistic parcellation map (52), with the border between anterior and  
18      posterior temporal lobe areas determined according to a plane perpendicular to the lobe’s main  
19      axis (53). We also conducted RSA for a distributed, functionally defined region-of-interest (ROI)  
20      based on the voxel-based meta-analysis by Binder and colleagues (49) (Figure 1D; heretofore  
21      referred to as “semantic network ROI”). The semantic network ROI spanned a large swathe of  
22      heteromodal cortex, including most of the aforementioned cortical areas. The neural similarity  
23      structure of concept representations in this ROI reflects not only information encoded in the

1 activation patterns within each cortical area, but also information encoded in the pattern of  
2 activations across different areas, thus allowing us to examine semantic representation in the  
3 network as a whole.

4 From the fMRI data, we generated a whole-brain activation map for each concept, reflecting  
5 the unique spatial pattern of neural activity for that concept (Figure 1). From these maps, a neural  
6 representational dissimilarity matrix (RDM) was generated for each ROI. RDMs consisted of all  
7 pairwise dissimilarities ( $1 - \text{correlation}$ ) between the vectorized activation patterns across voxels.  
8 For each representational model investigated, a model-based RDM was computed, and its  
9 similarity to the neural RDM was evaluated via Spearman correlation. We evaluated six different  
10 representational models: two based on taxonomic information, two based on experiential  
11 information, and two based on distributional information (see details below). The resulting  
12 profile of relative model performances provided an assessment of the degree to which each type  
13 of information is reflected in the neural activation patterns corresponding to different concepts.  
14 Because the RDMs from different models were partly correlated with each other (Table S1), we  
15 also conducted partial correlation RSAs to evaluate the unique contribution of each model to  
16 neural concept representation. We stress that the representational models investigated here are  
17 models of *information content* (i.e., taxonomic, experiential, or distributional); they are not  
18 meant to model the neural architecture through which information is encoded in the brain (see  
19 Supplementary Materials for extended model descriptions).

20 **Taxonomic models.** *WordNet* is the most influential representational model based on  
21 taxonomic information, having been used in several neuroimaging studies to successfully model  
22 semantic content (2, 22, 54, 55). It is organized as a knowledge graph in which words are  
23 grouped into sets of synonyms (“synsets”), each expressing a distinct concept. Synsets are richly



1 interconnected according to taxonomic relations, resulting in a hierarchically structured network  
2 encompassing 81,426 noun concepts (in the English version). Concept similarity is computed  
3 based on the shortest path connecting the two concepts in this network.

4 In contrast to WordNet, which provides a comprehensive taxonomy of lexical concepts, the  
5 *Categorical* model was customized to encode the particular taxonomic structure of the concept  
6 set in each study, based on a set of *a priori* categories. Therefore, the Categorical model ignores  
7 concept categories that were not included in the study, such as “furniture” or “clothing”. To  
8 reduce the level of subjectivity involved in the assignment of items to categories and in the  
9 evaluation of inter-category similarities, we tested 18 *a priori* versions of the Categorical model,  
10 with different numbers of categories and different levels of hierarchical structure, for the  
11 concepts in Study 1 (Figure S1). Each version was tested via RSA against the fMRI data, and the  
12 best performing version was selected for comparisons against other types of models. The  
13 selected model for Study 1 (model N in Figure S1) consisted of 19 hierarchically structured  
14 categories: Abstract (Mental Abstract, Social Abstract, Social Event, Other Abstract), Event  
15 (Social Event, Concrete Event), Animate (Animal, Human, Body Part), Inanimate (Artifact  
16 [Musical Instrument, Vehicle, Other Artifact], Food, Other Inanimate), and Place.

17 In Study 2, the Categorical model consisted of 2 higher-level categories – Object and Event –  
18 each consisting of 4 sub-categories (Animal, Plant/Food, Tool, Vehicle; Sound Event, Social  
19 Event, Communication Event, Negative Event).

20 **Experiential models.** The *Exp48* model consists of 48 dimensions corresponding to distinct  
21 aspects of phenomenal experience, such as color, shape, manipulability, pleasantness, etc. (Table  
22 S2). This model is based on the experiential salience norms of Binder and colleagues (40), in  
23 which each dimension encodes the relative importance of an experiential attribute according to

1 crowd-sourced ratings. Exp48 encompasses all perceptual, motor, spatial, temporal, causal,  
2 valuation, and valence dimensions present in those norms.

3 The *SM8* model consists of a subset of the Exp48 dimensions, focusing exclusively on  
4 sensory-motor information. These dimensions represent the relevance of each sensory modality  
5 (vision, audition, touch, taste, and smell) and of action schemas performed with each motor  
6 effector (hand, foot, and mouth) to the concept. The concept “apple”, for instance, has high  
7 values for vision, touch, taste, mouth actions, and hand actions, and low values for the other  
8 dimensions.

9 **Distributional models.** Distributional information was modeled with two of the most  
10 prominent distributional models available: *word2vec* (56) uses a deep neural network trained to  
11 predict a word based on a context window of a few words preceding and following the target  
12 word. In contrast, *GloVe* (57) is based on the *ratio* of co-occurrence probabilities between pairs  
13 of words across the entire corpus. In a comparative evaluation of distributional semantic models  
14 (17), *word2vec* and *GloVe* emerged as the two top performing models in predicting human  
15 behavior across a variety of semantic tasks.

## 16 Study 1

17 Study 1 evaluated these six models with a set of 300 concepts spanning a wide variety of  
18 semantic categories, including animate objects (e.g., “elephant”, “student”), places (e.g.,  
19 “kitchen”, “beach”), artifacts (e.g., “comb”, “rocket”) and other inanimate objects (e.g., “cloud”,  
20 “ice”), events (e.g., “hurricane”, “election”), and highly abstract concepts (e.g., “fate”,  
21 “hygiene”) (Figure 2A, Tables S3-S4).

22

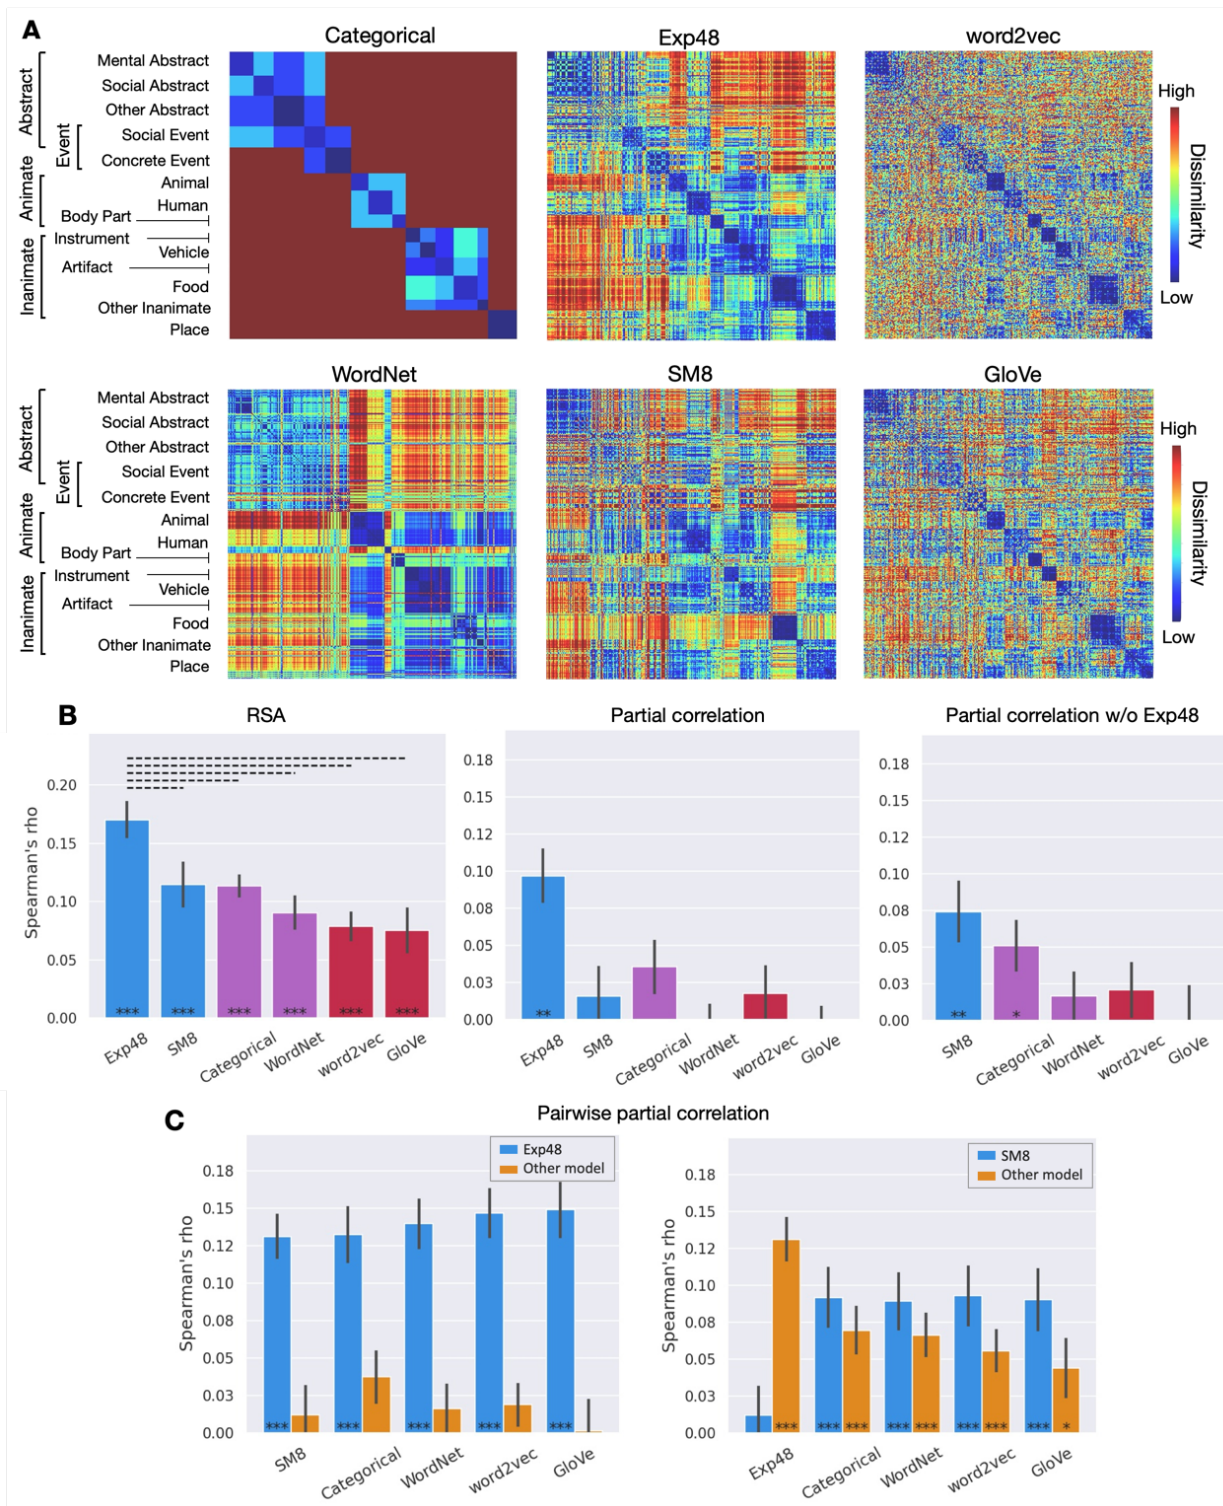

1

2

3

**Figure 2:** Study 1. A. Dissimilarity matrices for the representational spaces tested. Rows and columns represent each of the 300 concepts used in the study, grouped according to the

1       Categorical model to reveal taxonomic structure. B. RSA results for the semantic network ROI.  
2       Experiential (blue), taxonomic (purple), and distributional (red) models; Left: Correlations  
3       between the group-averaged neural RDM and each model-based RDM. Center: Partial  
4       correlation results for each model while controlling for its similarity with all other models. Right:  
5       Partial correlation results when Exp48 was excluded from the analysis. C. Pairwise partial  
6       correlations for the semantic network ROI, with blue bars representing Exp48 (left) or SM8  
7       (right) while controlling for its similarity to each of the other model-based RDMs; yellow bars  
8       correspond to each of the other model-based RDMs while controlling for their similarity to the  
9       model represented in blue. \*\*\*  $p < .0005$ , \*\*  $p < .005$ , \*  $p < .05$ , Mantel test; solid bar:  $p < .001$ ;  
10      dashed bar  $p < .05$ , permutation test. All p values are FDR-corrected for multiple comparisons ( $q$   
11      = .05). Error bars represent the standard error.

12

1 In the functionally defined “semantic network” ROI, the experiential models achieved the  
2 highest performance, followed by the taxonomic models (Figure 2B and 2C). Exp48 performed  
3 significantly better than any other model, with no other differences between models reaching  
4 significance. To investigate the unique contribution of each type of information to the similarity  
5 structure of activation patterns, we conducted partial correlation RSAs. These analyses assessed  
6 how well each model explained the neural data after controlling for its similarity to other models.  
7 We conducted RSAs with the RDM of each model after regressing out the RDMs of all other  
8 models. As shown in Figure 2B (center), only Exp48 explained significant variance in the neural  
9 data after controlling for the other models. To verify whether Exp48 individually explains all of  
10 the variance accounted for by each of the other models, we performed pairwise partial  
11 correlation RSAs (Figure 2C, left). These analyses showed that no other model accounted for  
12 any measurable additional variance after controlling for their similarity to Exp48. In other words,  
13 Exp48 was the only model that made unique contributions to explaining the representational  
14 structure of lexical concepts in the semantic network ROI, while the other models only predicted  
15 the data to the extent that their similarity structure correlated with that of Exp48.

16 We then investigated whether information about the relative importance of eight sensory-  
17 motor modalities, by itself, successfully predicted the neural similarity structure of concepts after  
18 controlling for taxonomic and distributional information. The results showed that, when Exp48  
19 was not included in the partial correlation analysis, SM8 remained highly significantly correlated  
20 with the data after controlling for all other models, while WordNet, word2vec and GloVe did not  
21 (Figure 2B, right). Categorical was the only other model displaying a significant partial  
22 correlation, although numerically lower and less significant than that of SM8. Pairwise partial  
23 correlation RSAs showed that SM8 did not explain all the variance accounted for by WordNet,

1 word2vec, or GloVe; however, there was a trend toward stronger partial correlations for SM8  
2 than for any of the non-experiential models (Figure 2C, right). Together, these results suggest  
3 that experiential information – including but not restricted to sensory-motor information – plays  
4 a fundamental role in the neural representation of conceptual knowledge in heteromodal cortical  
5 areas, while taxonomic and distributional representational systems appear to contribute relatively  
6 little independent information.

7 All six models predicted the similarity structure of concept-related neural activation patterns  
8 in left AG, PCun, SFG, and IFG (Figures S2 and S3). In all of these areas, as well as in left and  
9 right PCG, left PHG, right IFG, and right SFG, the Exp48 model achieved the strongest  
10 correlation. SM8 did not perform as well as Exp48, and this difference reached significance in  
11 several ROIs, particularly in the left IFG. The same areas also showed a significant advantage for  
12 Exp48 over WordNet. The advantage of Exp48 over the Categorical model reached significance  
13 in left AG, PCun, PC, and PHG, and in right IFG and SFG. There was a trend toward higher  
14 correlations for Categorical than for WordNet in most areas, but this difference only reached  
15 significance in the left pSTS, the only area in which Categorical (or any other model)  
16 significantly outperformed both experiential models. Besides the pSTS, the Categorical model  
17 also achieved the highest correlation of any model in the left pFusG, pMTG, pSTG, and SMG,  
18 although this advantage only reached significance relative to word2vec in pSTG and pMTG and  
19 relative to SM8 in pMTG. Several areas showed a trend toward lower performance for word2vec  
20 and GloVe relative to the other models, and in most areas these two models performed similarly,  
21 with two exceptions: in left IFG, GloVe significantly outperformed word2vec, while the inverse  
22 effect was found in right PCun. The relatively low correlations for all models found in the aITG,

1 aFusG, TP, EC, aPHG, and mOFC may be due to lower signal-to-noise ratio in those areas  
2 (Table S7).

### 3 Study 2

4 Study 2 was designed to further investigate the information content of concept  
5 representations with a different set of concepts, a larger participant sample size, and matched  
6 subsets of object and event concepts. This study examined whether the pattern of model  
7 performances found in Study 1 would be observed independently for objects and events, or –  
8 given their markedly distinct ontological status – whether these two types of concepts would  
9 differ in the degree to which they encode experiential, taxonomic, and distributional information.  
10 The 320 concepts included in the study were selected to be typical exemplars of four categories  
11 of objects (animals, tools, plants/foods, and vehicles) and four categories of events (sounds,  
12 negative events, social events, and communication events). The larger sample size (36  
13 participants) allowed for statistical testing across participants as well as across stimuli (i.e.,  
14 words).

15 In the semantic network ROI, Exp48 outperformed all other models when tested across  
16 participants and across stimuli (Figures 3B, left and S6, left), and, in both analyses, it was the  
17 only model that retained explanatory power after controlling for the predictions of all other  
18 models (Figure 3B, center, and S6, center). SM8 also performed significantly better than all non-  
19 experiential models, and Categorical outperformed WordNet, word2vec, and GloVe.

20



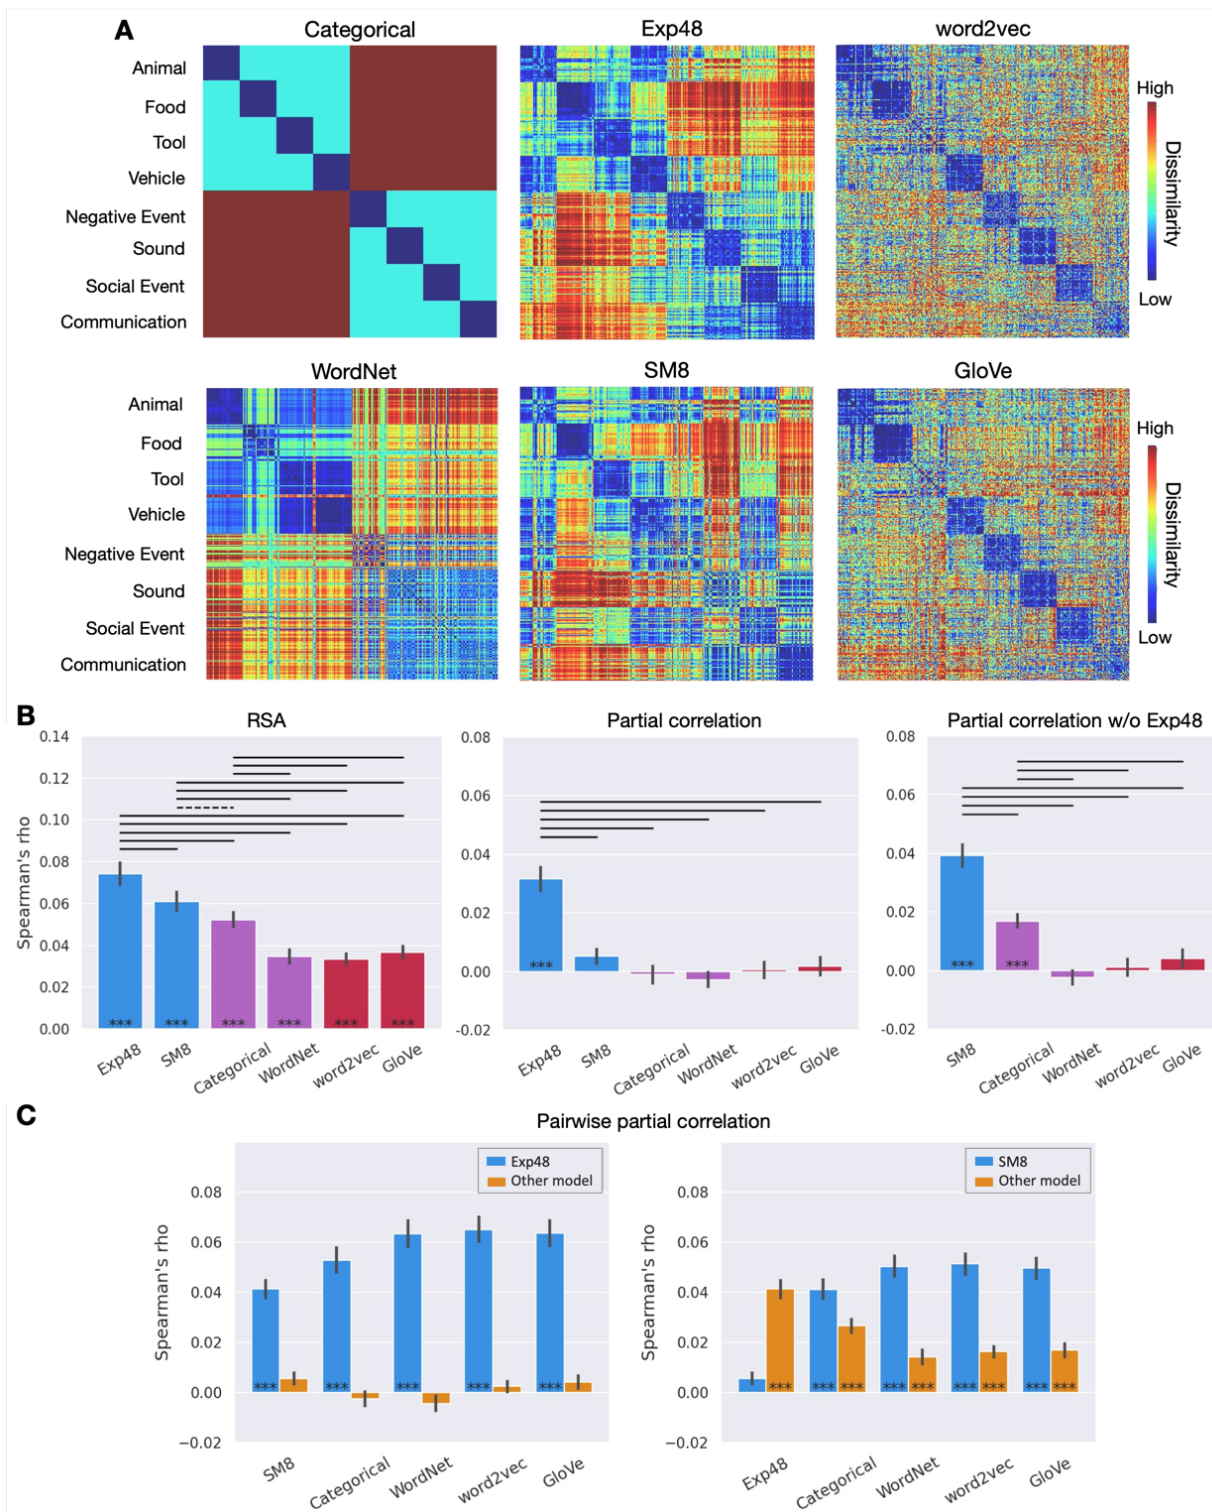

1

2

3

**Figure 3.** Study 2. A. Dissimilarity matrices for the representational spaces tested. Rows and columns have been grouped according to the Categorical model to reveal taxonomic structure.



1 B. RSA results across participants for the semantic network ROI. Group mean values of the  
2 correlations between each participant's neural RDM and the model-based RDMs. Full RSA  
3 correlations (left) and partial correlations with Exp48 included (center) and excluded (right). C.  
4 Pairwise partial correlations, with blue bars representing Exp48 (left) or SM8 (right) while  
5 controlling for its similarity to each of the other models; yellow bars correspond to each of the  
6 other models while controlling for their similarity to the model represented in blue. \*\*\*  $p <$   
7  $.0005$ , \*\*  $p < .005$ , \*  $p < .05$ ; solid bar:  $p < .001$ ; dashed bar  $p < .05$ ; Wilcoxon signed-rank tests.  
8 All  $p$  values are FDR-corrected for multiple comparisons ( $q = .05$ ). Error bars represent the  
9 standard error of the mean.

10

1 Partial correlation RSAs revealed that Exp48 accounted for all the variance explained by the  
2 other models (Figure 3B, center and 3C, left). When Exp48 was left out of the analysis, SM8 and  
3 Categorical together accounted for all the variance explained (Figure 3B, right), with SM8  
4 performing significantly better than Categorical. Confirming the main findings of Study 1, these  
5 results indicate that experiential information plays a central role in the representation of lexical  
6 concepts in high-level heteromodal cortical areas.

7 Separate analyses for objects and events revealed two main differences between these two  
8 types of concepts (Figures 4, S7-S10). First, RSA correlations were substantially higher for  
9 events than for objects, across all three types of representational models, in almost all ROIs. This  
10 result reflects the higher variability of pairwise similarities for the neural representations of event  
11 concepts, as evidenced by the higher noise ceiling in this condition (mean noise ceiling across  
12 anatomical ROIs, lower bound = 0.17) relative to object concepts (0.14). Inspection of the neural  
13 RDM (Figure S11) reveals a slightly more pronounced categorical structure for events than for  
14 objects, with particularly high pairwise similarities for communication events and social events.

15

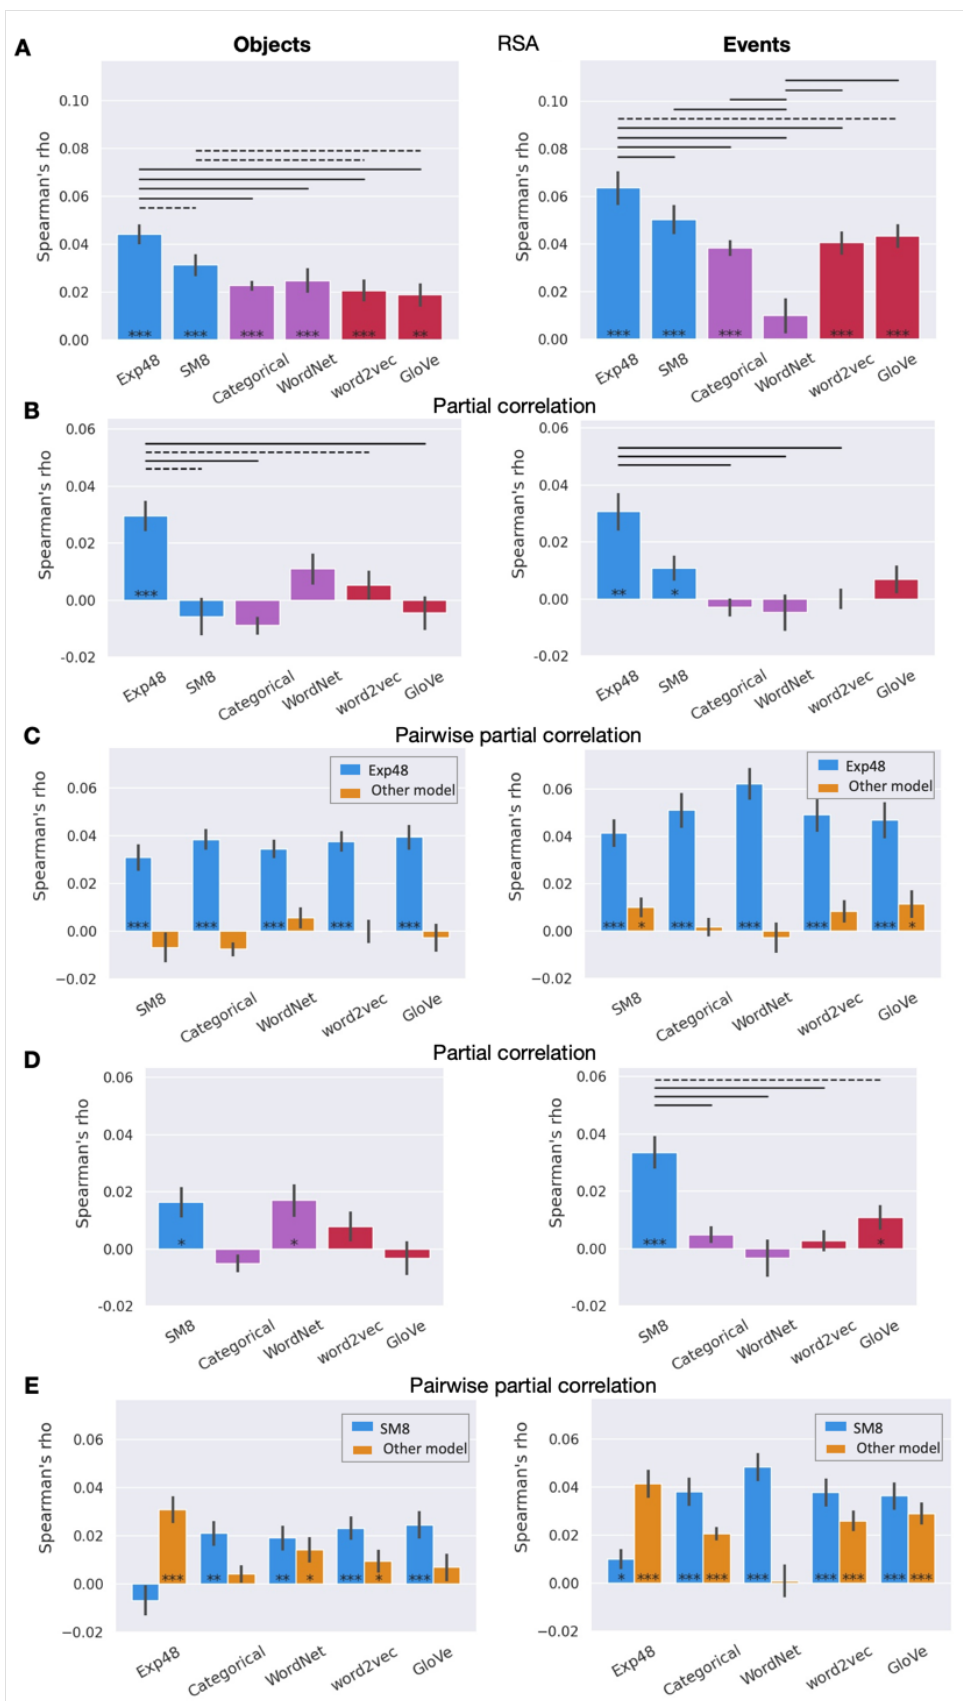

1     **Figure 4.** Results for object concepts (left column) and event concepts (right column) for the  
2     semantic network ROI in Study 2 (across participants). A. RSA results. B. Partial correlations. C.  
3     Pairwise partial correlations for Exp48. D. Partial correlations with Exp48 excluded from the  
4     analysis. E. Pairwise partial correlations for SM8. Color and symbol conventions as in Figure 3.  
5

1 In all anatomically defined ROIs, RSAs based on the entire concept set (i.e., all categories  
2 included) revealed an advantage for experiential models relative to taxonomic and distributional  
3 models (Figures S4 and S5). As in Study 1, correlations were particularly strong in the left IFG,  
4 AG, and PCun, with the IFG showing substantially stronger correlations than other ROIs. For all  
5 models, correlations were stronger in left hemisphere ROIs than in their right hemisphere  
6 homologs, consistent with left lateralization of lexical semantic representations. The relatively  
7 low correlations found in the aITG, aFusG, TP, EC, aPHG, and mOFC may be due to lower  
8 signal-to-noise ratio in those areas (Table S7). In almost all ROIs examined (45 out of 46),  
9 correlations were significantly stronger for the experiential models than for taxonomic or  
10 distributional models. Both experiential models significantly outperformed all other models in 17  
11 ROIs, and nowhere did a taxonomic or distributional model perform significantly better than  
12 SM8 or Exp48 (the superiority of the Categorical model in the pSTS observed in Study 1 was  
13 not replicated here). Exp48 significantly outperformed SM8 in left aSTG, pSTG, AG, pMTG,  
14 IFG, pFusG, cMFG, and SFG; and in right AG, SMG, pSTS, cMFG, and SFG. No significant  
15 differences between the two experiential models were found in the other ROIs.

16 Except for the left AG, WordNet appears to perform worse for events than for objects in all  
17 other ROIs, both in absolute terms and in relation to other models. This difference, which was  
18 strongest in the PCG, is likely due to taxonomic trees for events being relatively shallower in this  
19 model (mean tree depth for objects and events is 10.6 and 8.1, respectively), resulting in a  
20 narrower range of possible pairwise similarities. Apart from WordNet, the overall profile of  
21 relative model performances was similar across objects and events. For both types of concepts,  
22 experiential models achieved the strongest RSA correlations in most anatomical regions, with no  
23 ROIs showing significantly stronger correlations for any taxonomic or distributional model.

1 Partial correlation RSAs in the semantic network ROI showed that, for object concepts, Exp48  
2 accounted for all the variance explained by any other model (Figure 4, B and C). For events,  
3 SM8 and GloVe maintained relatively weak but statistically significant correlations after  
4 controlling for Exp48. SM8 was second to Exp48 in explaining the most variance for both  
5 objects and events (Figure 4, D and E).

## 6 Validation analyses

7 While the experiential feature ratings included in Exp48 and SM8 were meant to capture  
8 particular qualities of phenomenal experience, it is possible that the ratings themselves were  
9 influenced by other types of information as well, including more abstract knowledge about the  
10 target concept or about contextually associated concepts. Therefore, it is conceivable that a  
11 model based on semantic features that do not focus on experiential information could also  
12 outperform the taxonomic and distributional models. To assess this possibility, we conducted a  
13 new set of analyses in which we included a model based on semantic features that are not  
14 explicitly focused on experiential information. This model was based on the Semantic Feature  
15 Production Norms (SFPN), which are the largest and best-known effort to characterize word  
16 meanings in terms of descriptive semantic features (58–60). These features are derived from  
17 descriptive properties generated by human participants in a property listing task, resulting in  
18 concept representations based on thousands of features. They encode various types of  
19 information, including taxonomic (e.g., “is a mammal”), functional (e.g., “used for cooking”),  
20 and contextual association, as well as more elaborate features (e.g., “lays eggs”, “lives in the  
21 water”).

22 These analyses were based on the concepts included in our studies for which SFPN  
23 representations are available (220 concepts in Study 1 and 196 concepts in Study 2). The results

1 show that SFPN was the worst performing of the seven models tested, and that both Exp48 and  
2 SM8 significantly outperformed it in both studies (Figure S12). These results indicate that the  
3 high performance of Exp48 and SM8 relative to the other models is indeed due to their focus on  
4 experiential information.

## 5 **Discussion**

6 In two studies, we conducted a quantitative assessment of the degree to which the three main  
7 information structures proposed for concept representation are encoded in fMRI activation  
8 patterns corresponding to individual lexical concepts. We found that Exp48 – a representational  
9 model based on 48 distinct experiential dimensions grounded in known neurocognitive systems –  
10 consistently outperformed taxonomic and distributional models in predicting the neural similarity  
11 structure of a large number of lexical concepts (524 across both studies), spanning a wide variety  
12 of semantic categories. Additionally, SM8, a relatively impoverished experiential model based  
13 on only eight sensory-motor dimensions reflecting the relative importance of neural systems  
14 dedicated to vision, hearing, touch, taste, and smell, as well as motor control of the hands,  
15 mouth, and feet, exceeded the performance of the best performing taxonomic and distributional  
16 models in the semantic network ROI in Study 2. SM8 significantly outperformed those models in  
17 17 anatomical ROIs, while matching their performance in the remaining ones. These results  
18 provide compelling evidence that experiential information grounded in sensory, motor, spatial,  
19 temporal, affective, and reward neural systems plays a fundamental role in the neural  
20 representation of concepts – not only in sensory-motor cortical areas, as indicated in previous  
21 studies, but also in high level association areas.

22 In both experiments, Exp48 was the only model whose predictions correlated with the neural  
23 similarity structure of the entire concept set when controlling for the predictions of all other

1 models, and in Study 2 this was also true for object concepts in particular. For event concepts,  
2 SM8 was the only other model that independently accounted for variance in the neural data. The  
3 fact that taxonomic and distributional models did not predict the neural RDM when controlling  
4 for the predictions of Exp48 alone (Figures 2C and 3C, left panel) indicates that those models  
5 provide no measurable additional information about concept similarity structure. This suggests  
6 that taxonomic information, while seemingly central to the organization of conceptual  
7 knowledge, may be represented only indirectly, via its interdependency with experiential  
8 information (40).

9 Another important finding was that RSA correlations in the PCG and in the PCun were among  
10 the strongest across all ROIs examined, rivaling or even surpassing those found in the AG and in  
11 the temporal lobe. PCG and PCun are not typically included in discussions of cortical “semantic  
12 hubs” (3, 4, 28), although they have been consistently associated with semantic processing in  
13 functional neuroimaging studies (30, 49, 61, 62). This finding, replicated across Studies 1 and 2,  
14 indicates that these regions play an important and yet unrecognized role in concept  
15 representation.

16 One limitation of the present study is that the representational spaces used to model  
17 experiential information content are relatively coarse. Neural concept representations must  
18 encode detailed information about aspects of the phenomenal experience associated with  
19 different lexical concepts, such as particular colors, shapes, or motor schemas, but Exp48 and  
20 SM8 only encode the relative importance of each kind of experience. In other words, these  
21 models represent information about how much the neural system underlying a particular process  
22 (e.g., color perception, motor control of the hand) contributes to a lexical concept representation,  
23 but it contains no information about the particular representations contributed by each system



1 (e.g., different hues or different motor schemas). This coarseness, which results from practical  
2 limitations in obtaining participant ratings about fine-grained experiential attributes, imposes  
3 limitations on our ability to detect experiential information in the neural data. Nevertheless, it is  
4 still surprising that these models performed so well compared to some of the most sophisticated  
5 taxonomic and distributional models available, pointing to the development of more detailed  
6 experiential models as a promising direction for future work.

7 Although most researchers agree that the representation of conceptual information per se  
8 should be independent of the modality of the stimulus, concept-related neural activation patterns  
9 elicited by non-verbal stimuli may differ to some extent from those elicited by words. We used  
10 words as stimuli primarily for methodological reasons: First, unlike pictures, word forms are  
11 arbitrarily associated with conceptual content. The visual, motor, or auditory representations of a  
12 word form carry no information about the semantic properties of the lexical concept associated  
13 with it. Pictorial stimuli, on the other hand, carry information about visual properties of the  
14 concept, which can bias participants to focus on those properties at the expense of properties that  
15 are not explicitly conveyed by the stimulus. Second, word stimuli allow for inclusion of  
16 relatively abstract concepts (e.g., “belief”, “year”) which are not easily conveyed via other  
17 stimulus modalities. Finally, in most experiential, taxonomic, and distributional model  
18 implementations, concepts are labeled exclusively using word forms.

19 Task requirements can also have an influence on activation patterns. For example, asking  
20 participants to make decisions about the stimulus based on a particular semantic criterion (e.g.,  
21 living vs. non-living, large vs. small, natural vs. man-made) emphasizes those aspects of  
22 meaning to the detriment of all others. Our approach was to use a task that would be as neutral as  
23 possible regarding the conceptual content of the items. We see no reason to believe that our task

1 favors some particular aspect of meaning over another, although that possibility has not been  
2 experimentally ruled out.

3 Together, the present results indicate that concept representations in heteromodal cortical  
4 areas encode information about features of phenomenal experience grounded in sensory-motor,  
5 spatiotemporal, affective, and reward systems. While other studies have shown that areas  
6 involved in sensory perception and motor control are activated during concept retrieval (13, 28,  
7 30), our results imply that information pertaining to these systems is directly encoded in high-  
8 level association areas during concept retrieval. The idea that concepts are neurally represented  
9 as amodal symbols whose representational code is independent of modality-specific systems has  
10 a long history (23, 37); however, the finding that taxonomic and distributional models performed  
11 significantly worse than both SM8 and Exp48 in Study 2 challenges that view. While our results  
12 do not rule out the notion that concepts are organized in hierarchical taxonomic networks, they  
13 are more aligned with a view in which concept representations emerge from the multimodal  
14 integration of signals originating in modality-specific systems during concept acquisition, and in  
15 which taxonomic organization emerges from correlations between experiential features (14, 30).  
16 In this framework, concept retrieval consists of the transient activation of a neuronal cell  
17 assembly distributed across the heteromodal cortical hubs that make up the semantic network,  
18 with possible downstream activation of the relevant modality-specific assemblies depending on  
19 contextual demands. Further research is required to determine the extent to which different  
20 experiential features contribute to concept representation in different parts of the semantic  
21 network, and how their relative importance varies across ontological categories.

22 In addition to their implications for the nature of the representations underlying conceptual  
23 knowledge, the present results are also relevant to computational approaches to natural language

1 processing in the field of artificial intelligence. They suggest that incorporating experiential  
2 information into computational models of word meaning could lead to more human-like  
3 performance. These findings can also inform the development of brain-machine interface  
4 systems by demonstrating that information about the experiential content of conceptual thought  
5 can be decoded from the spatial distribution of neural activity throughout the cortex.

## 6 **Materials and Methods**

### 7 Study 1

8 This study was designed for RSA across stimuli rather than across participants, with a large  
9 number of trials (1,800 trials) and long scanning times, which allowed sufficient power to be  
10 achieved with a relatively small sample size ( $N = 8$ ).

11 **Participants:** Eight native speakers of English (4 women), ages 19-37 (mean = 28.5) took  
12 part in Study 1. Participants were all right-handed according to the Edinburgh Handedness Scale  
13 (63), had at least a high school education, and had no history of neurological or psychiatric  
14 conditions. All participants provided written informed consent. This study was approved by the  
15 Medical College of Wisconsin Institutional Review Board.

16 **Stimuli:** Stimuli included 300 English nouns of various categories, including concrete and  
17 abstract concepts. Nouns were relatively familiar, with mean log-transformed HAL frequency of  
18 8.7 (range 4.0–12.7) and mean age of acquisition of 6.7 years (range 2.7–13.8; English Lexicon  
19 Project (<https://lexicon.wustl.edu>) (64); Tables S3-S4).

20 **Task:** Participants rated each noun according to how often they encountered the  
21 corresponding entity or event in their daily lives, on a scale from 1 (“rarely or never”) to 3  
22 (“often”). The task was designed to encourage semantic processing of the word stimuli without

1 emphasizing any particular semantic features or dimensions. Participants indicated their response  
2 by pressing one of three buttons on a response pad with their right hand. On each trial, a noun  
3 was displayed in written form on the center of the screen for 500 ms, followed by a 3.5-second  
4 blank screen. Each trial was followed by a central fixation cross with variable duration between 1  
5 and 4 s (mean = 2 s). The entire stimulus set was presented 6 times over the course of the study.  
6 In each presentation, the order of the stimuli was randomized. Each presentation was split into 3  
7 runs of 100 trials each. The task was performed over the course of 3 scanning sessions on  
8 separate days, with 2 presentations (6 runs) per session. Each run started and ended with an 8-  
9 second fixation cross.

10 **Equipment:** Scanning was performed on a GE Healthcare Discovery MR750 3T MRI  
11 scanner at the Medical College of Wisconsin's Center for Imaging Research. Stimulus  
12 presentation and response recording were performed via E-prime 2.0 software running on a  
13 Windows desktop computer and a Psychology Software Tools Serial Response Box. Stimuli  
14 were back-projected on a screen positioned behind the scanner bore and viewed through a mirror  
15 attached to the head coil.

16 **Scanning protocol:** MRI scanning was conducted over 3 separate sessions on different days.  
17 Each session consisted of a structural T1-weighted MPRAGE scan, a structural T2-weighted  
18 CUBE scan, 3 pairs of T2-weighted spin echo echo-planar scans (5 volumes each) acquired with  
19 opposing phase-encoding directions (for correction of geometrical distortions in the functional  
20 images), and 6 gradient echo echo-planar runs using simultaneous multi-slice acquisition (8x  
21 multiband, TR = 1200 ms, TE = 33.5 ms, 512 volumes, flip angle = 65, matrix = 104 x 104, slice  
22 thickness = 2.0 mm, axial acquisition, 72 slices, field-of-view = 208 mm, voxel size = 2 x 2 x 2  
23 mm).

1       **Data analysis:** Functional MRI images were pre-processed (slice timing correction, motion  
2 correction, distortion correction, volume alignment, scaling) using AFNI (65). Statistical  
3 analyses were conducted in each participant’s original coordinate space. Activation (beta) maps  
4 were generated for each noun relative to the mean signal across all other nouns using AFNI’s  
5 3dDeconvolve. Response time z scores and head motion parameters were included as regressors  
6 of no interest. Anatomically defined ROIs were created based on the probabilistic Desikan-  
7 Killiany parcellation atlas included in AFNI (TT\_desai\_dk\_mpm; Figure S12). The functionally  
8 defined semantic network ROI corresponded to the 1% most consistently activated voxels in an  
9 activation likelihood estimate (ALE) meta-analysis of 120 neuroimaging studies of semantic  
10 language processing (49) (main text Figure 1D). All ROI masks were created in MNI coordinate  
11 space and non-linearly aligned to each participant’s anatomical scan using AFNI’s 3dQwarp.  
12 Neural RDMs were computed for each ROI as the Spearman correlation distance ( $1 - \rho$ ) for all  
13 pairs of concepts. A group-averaged neural RDM was computed by averaging the neural RDMs  
14 of all participants. A model-based RDM was computed from each model (except WordNet) as  
15 the cosine distance ( $1 - \text{cosine}$ ) for all pairs of concept vectors. The WordNet RDM was based  
16 on the Wu & Palmer similarity metric (WPsim), which relies on the depth of the two synsets in  
17 the taxonomic tree and that of their Least Common Subsumer (LCS, i.e., their most specific  
18 common hypernym):

$$\text{WPsim} = 2 \times \text{depth}(\text{LCS}(s1, s2)) / (\text{depth}(s1) + \text{depth}(s2))$$

19  
20       We used the package Natural Language Toolkit (NLTK 3.4.5; <https://www.nltk.org>) to  
21 compute WPsim; WordNet dissimilarity was computed as  $1 - \text{WPsim}$ .

22       The RSAs computed the Spearman correlation between the group-averaged neural RDMs  
23 and each model-based RDM. Statistical significance was tested using the Mantel test with 10,000

1 permutations. Differences in RSA correlations between models were assessed for significance  
2 via permutation tests. Significance was controlled for multiple comparisons via false discovery  
3 rate (FDR) with  $q = .05$ . Since the model-based RDMs can be strongly correlated between  
4 models (Table S1), these analyses were supplemented with partial correlation analyses to reveal  
5 the unique contribution of each model after controlling for other models.

6 We also conducted a temporal signal-to-noise ratio (tSNR) analysis to assess data quality  
7 across the cortical mantle. A GLM was conducted with parametric regressors for word  
8 concreteness, word length, response time, and head motion parameters, and a binary regressor  
9 for trial onset. Each regressor was convolved with a canonical HRF to generate the design  
10 matrix. A GLM was conducted on the scaled, smoothed (6 mm) imaging data for each  
11 participant, and a tSNR map was computed by dividing the mean signal by the standard  
12 deviation of the residuals. The individual maps were warped into the MNI 152 2009c template  
13 via affine transformation and averaged together to generate a group-averaged tSNR map (Figure  
14 S13).

## 15 Study 2

16 Study 2 was designed to assess the contribution of each representational system separately  
17 for object and event concepts in the semantic network ROI, and to achieve sufficient power for  
18 model comparisons within anatomically defined ROIs with RSA across participants as well as  
19 across stimuli, which required a substantially larger sample size ( $N = 36$ ).

20 **Participants:** 36 native speakers of English (21 women), ages 20-41 (mean = 28.7) took part  
21 in Study 2. Participants were all right-handed according to the Edinburgh Handedness Scale (63),  
22 had at least a high school education, and had no history of neurological or psychiatric conditions.

1 None of the participants took part in Study 1. All participants provided written informed consent.  
2 This study was approved by the Medical College of Wisconsin Institutional Review Board.

3 **Stimuli:** Stimuli included 160 object nouns (animals, foods, tools, and vehicles – 40 of each)  
4 and 160 event nouns (social events, verbal communication events, non-verbal sound events,  
5 negative events – 40 of each) (Tables S5-S6). Of the 320 concepts included in Study 2, 62  
6 objects and 34 events were also used in Study 1.

7 **Task:** Task instructions were identical to Study 1. On each trial, a noun was displayed in  
8 written form on the center of the screen for 500 ms, followed by a 2.5-second blank screen. Each  
9 trial was followed by a central fixation cross with variable duration between 1 and 3 s (mean =  
10 1.5 s). The entire stimulus set was presented 6 times over the course of the study in randomized  
11 order. Each presentation was split into 4 runs of 80 trials each. The task was performed over the  
12 course of 3 scanning sessions on separate days, with 2 presentations (8 runs) per session. Each  
13 run started and ended with an 8-second fixation cross.

14 **Equipment:** Scanning was performed on a GE Healthcare Premier 3T MRI scanner with a  
15 32-channel Nova head coil at the Medical College of Wisconsin's Center for Imaging Research.  
16 Stimulus presentation and response recording were performed with Psychopy 3 software (66)  
17 running on a Windows desktop computer and a Celeritas fiber optic response system  
18 (Psychology Software Tools, Inc.). Stimuli were displayed on an MRI-compatible LCD screen  
19 positioned behind the scanner bore and viewed through a mirror attached to the head coil.

20 **Scanning protocol:** MRI scanning was conducted on 3 separate visits. Each session  
21 consisted of a structural T1-weighted MPRAGE scan, a structural T2-weighted CUBE scan, 3  
22 pairs of T2-weighted spin echo echo-planar scans (5 volumes each) acquired with opposing  
23 phase-encoding directions, and 8 gradient echo echo-planar functional scans (4x multiband, TR =

1 1500 ms, TE = 33 ms, 251 volumes, flip angle = 50, in-plane matrix = 104 x 104, slice thickness  
2 = 2.0 mm, axial acquisition, 68 slices, field-of-view = 208 mm, voxel size = 2 x 2 x 2 mm).

3 **Data analysis:** Data preprocessing and statistical analysis were performed as described in  
4 Study 1. RDMs for the models tested in Study 2 are depicted in Figure 3 (main text), and inter-  
5 model correlations are displayed in Table S1.

6 RSAs were conducted across stimuli (i.e., words) and across participants. In the analysis  
7 across stimuli, voxel-based RDMs from all participants were combined into a group-averaged  
8 neural RDM, and, for each model, a single correlation was computed between this RDM and the  
9 model-based RDM. These correlations were tested for significance via the Mantel test with  
10 10,000 permutations. In the analysis across participants, a correlation was computed, for each  
11 model, between each participant's neural RDM and the model-based RDM. The Fisher Z-  
12 transformed correlation coefficients were then averaged across participants to compute the group  
13 mean rho, and significance tested via Wilcoxon's Signed Rank test.

14 Differences in RSA correlations between models were tested across words via permutation  
15 test (Mantel) and across participants via Wilcoxon's Signed-Rank test. Significance was  
16 controlled for multiple comparisons via false discovery rate (FDR) with  $q = .05$ .

17 A group-averaged tSNR map was computed as in Study 1.

18  
19 **Acknowledgments:** The authors wish to thank Elizabeth Awe and Jed Mathis for assistance with  
20 data collection and management and two anonymous reviewers for valuable comments and  
21 suggestions on a previous version of the article. **Funding:** This project was supported by grants  
22 National Institute on Deafness and Other Communication Disorders R01-DC016622 to J.R.B.



1 and Advancing a Healthier Wisconsin Project #5520462 to Brian-Fred Fitzsimmons. **Author**  
2 **contributions:** L.F. conceived the study, coordinated data acquisition, analyzed the data,  
3 prepared figures and tables, and wrote the initial draft; J. Tong contributed to data analyses;  
4 C.J.H. contributed software tools for data acquisition; J.R.B. and L.L.C. contributed to task  
5 design, developed the stimulus set, and reviewed/edited the manuscript; J.R.B supervised the  
6 project and acquired financial support. **Competing interests:** Authors declare no competing  
7 interests.

8

1       **References:**

- 2       1.     T. M. Mitchell, *et al.*, Predicting human brain activity associated with the meanings of  
3           nouns. *Science* (80-. ). **320**, 1191–1195 (2008).
- 4       2.     A. G. Huth, W. A. de Heer, T. L. Griffiths, F. E. Theunissen, J. L. Gallant, Natural speech  
5           reveals the semantic maps that tile human cerebral cortex. *Nature* **532**, 453–458 (2016).
- 6       3.     F. Carota, N. Kriegeskorte, H. Nili, F. Pulvermüller, Representational similarity mapping  
7           of distributional semantics in left inferior frontal, middle temporal, and motor cortex.  
8           *Cereb. Cortex* **27**, 294–309 (2017).
- 9       4.     M. A. Lambon Ralph, E. Jefferies, K. Patterson, T. T. Rogers, The neural and  
10          computational bases of semantic cognition. *Nat. Rev. Neurosci.* **18**, 42–55 (2017).
- 11      5.     F. Pereira, *et al.*, Toward a universal decoder of linguistic meaning from brain activation.  
12          *Nat. Commun.* **9**, 1–13 (2018).
- 13      6.     W. D. Ross, *Plato's Theory of Ideas* (Clarendon Press, 1951).
- 14      7.     E. E. Smith, D. L. Medin, *Categories and Concepts* (Harvard University Press, 2013).
- 15      8.     C. B. Mervis, E. Rosch, Categorization of natural objects. *Annu. Rev. Psychol.* **32**, 89–115  
16          (1981).
- 17      9.     A. M. Collins, E. F. Loftus, A spreading-activation theory of semantic processing.  
18          *Psychol. Rev.* **82**, 407–428 (1975).
- 19      10.    J. R. Anderson, A spreading activation theory of memory. *J. Verbal Learning Verbal*  
20          *Behav.* **22**, 261–295 (1983).
- 21      11.    A. R. Damasio, Time-locked multiregional retroactivation: a systems-level proposal for

- 1 the neural substrates of recall and recognition. *Cognition* **33**, 25–62 (1989).
- 2 12. A. M. Glenberg, What memory is for. *Behav Brain Sci* **20**, 1–55 (1997).
- 3 13. L. W. Barsalou, W. K. Simmons, A. Barbey, C. Wilson, Grounding conceptual knowledge  
4 in modality-specific systems. *Trends Cogn. Sci.* **7**, 84–91 (2003).
- 5 14. J. R. Binder, R. H. Desai, The neurobiology of semantic memory. *Trends Cogn. Sci.* **15**,  
6 527–536 (2011).
- 7 15. T. K. Landauer, S. T. Dumais, A solution to Plato’s problem: The latent semantic analysis  
8 theory of acquisition, induction, and representation of knowledge. *Psychol. Rev.* **104**, 211–  
9 240 (1997).
- 10 16. M. N. Jones, W. Kintsch, D. J. K. Mewhort, High-dimensional semantic space accounts of  
11 priming. *J. Mem. Lang.* **55**, 534–552 (2006).
- 12 17. F. Pereira, S. Gershman, S. Ritter, M. Botvinick, A comparative evaluation of off-the-  
13 shelf distributed semantic representations for modelling behavioural data. *Cogn.*  
14 *Neuropsychol.* **33**, 175–190 (2016).
- 15 18. M. Andrews, S. Frank, G. Vigliocco, Reconciling embodied and distributional accounts of  
16 meaning in language. *Top. Cogn. Sci.* **6**, 359–370 (2014).
- 17 19. E. M. Markman, Constraints children place on word meanings. *Cogn. Sci.* **14**, 57–77  
18 (1990).
- 19 20. M. Lucas, Semantic priming without association: a meta-analytic review. *Psychon Bull*  
20 *Rev* **7**, 618–630 (2000).
- 21 21. A. Caramazza, J. R. Shelton, Domain-specific knowledge systems in the brain: The

- 1 animate-inanimate distinction. *J. Cogn. Neurosci.* **10**, 1–34 (1998).
- 2 22. C. E. Crangle, M. Perreau-Guimaraes, P. Suppes, Structural similarities between brain and  
3 linguistic data provide evidence of semantic relations in the brain. *PLoS One* **8**, e65366--  
4 16 (2013).
- 5 23. G. Handjaras, *et al.*, How concepts are encoded in the human brain: A modality  
6 independent, category-based cortical organization of semantic knowledge. *Neuroimage*  
7 **135**, 232–242 (2016).
- 8 24. Y. Xu, *et al.*, Doctor, teacher, and stethoscope: Neural representation of different types of  
9 semantic relations. *J. Neurosci.* **38**, 3303–3317 (2018).
- 10 25. M. H. Fischer, R. a Zwaan, Embodied language: a review of the role of the motor system  
11 in language comprehension. *Q. J. Exp. Psychol. (Hove)*. **61**, 825–850 (2008).
- 12 26. T. T. Rogers, K. S. Graham, K. Patterson, Semantic impairment disrupts perception,  
13 memory, and naming of secondary but not primary colours. *Neuropsychologia* **70**, 296–  
14 308 (2015).
- 15 27. E. K. Warrington, R. A. McCarthy, Categories of knowledge: Further fractionations and  
16 an attempted integration. *Brain* **110**, 1273–96 (1987).
- 17 28. M. Kiefer, F. Pulvermüller, Conceptual representations in mind and brain: Theoretical  
18 developments, current evidence and future directions. *Cortex* **48**, 805–825 (2011).
- 19 29. L. Fernandino, *et al.*, Parkinson’s disease disrupts both automatic and controlled  
20 processing of action verbs. *Brain Lang.* **127**, 65–74 (2013).
- 21 30. L. Fernandino, *et al.*, Concept representation reflects multimodal abstraction: A  
22 framework for embodied semantics. *Cereb. Cortex* **26**, 2018–2034 (2016).

- 1 31. L. Fernandino, C. J. Humphries, L. L. Conant, M. S. Seidenberg, J. R. Binder,  
2 Heteromodal cortical areas encode sensory-motor features of word meaning. *J. Neurosci.*  
3 **36** (2016).
- 4 32. A. J. Anderson, *et al.*, Predicting neural activity patterns associated with sentences using a  
5 neurobiologically motivated model of semantic representation. *Cereb. Cortex* **27**, 4379–  
6 4395 (2017).
- 7 33. K. Patterson, P. J. Nestor, T. T. Rogers, Where do you know what you know? The  
8 representation of semantic knowledge in the human brain. *Nat Rev Neurosci* **8**, 976–987  
9 (2007).
- 10 34. T. T. Rogers, *et al.*, Structure and deterioration of semantic memory: a neuropsychological  
11 and computational investigation. *Psychol. Rev.* **111**, 205–235 (2004).
- 12 35. M. N. Jones, D. J. K. Mewhort, Representing word meaning and order information in a  
13 composite holographic lexicon. *Psychol. Rev.* **114**, 1–37 (2007).
- 14 36. F. Günther, C. Dudschig, B. Kaup, Predicting lexical priming effects from distributional  
15 semantic similarities: A replication with extension. *Front. Psychol.* **7**, 313–339 (2016).
- 16 37. B. Z. Mahon, A. Caramazza, A critical look at the embodied cognition hypothesis and a  
17 new proposal for grounding conceptual content. *J Physiol Paris* **102**, 59–70 (2008).
- 18 38. R. A. Zwaan, Embodiment and language comprehension: Reframing the discussion.  
19 *Trends Cogn. Sci.* **18**, 229–234 (2014).
- 20 39. B. C. Malt, E. E. Smith, Correlated properties in natural categories. *J. Verbal Learning*  
21 *Verbal Behav.* **23**, 250–269 (1984).
- 22 40. J. R. Binder, *et al.*, Toward a brain-based componential semantic representation. *Cogn.*

- 1           *Neuropsychol.* **33**, 130–174 (2016).
- 2           41. B. Riordan, M. N. Jones, Redundancy in Perceptual and Linguistic Experience:  
3           Comparing Feature-Based and Distributional Models of Semantic Representation. *Top.*  
4           *Cogn. Sci.* **3**, 303–345 (2011).
- 5           42. D. E. Rumelhart, P. M. Todd, “Learning and connectionist representations” in *Attention*  
6           *and Performance 14: Synergies in Experimental Psychology, Artificial Intelligence, and*  
7           *Cognitive Neuroscience*, D. E. Meyer, S. Kornblum, Eds. (MIT Press, 1993), pp. 3–30.
- 8           43. T. T. Rogers, J. L. McClelland, Précis of semantic cognition: A parallel distributed  
9           processing approach. *Behav. Brain Sci.* **31**, 689–714 (2008).
- 10          44. M. Andrews, G. Vigliocco, D. Vinson, Integrating Experiential and Distributional Data to  
11          Learn Semantic Representations. *Psychol. Rev.* **116**, 463–498 (2009).
- 12          45. L. Chen, M. A. L. Ralph, T. T. Rogers, A unified model of human semantic knowledge  
13          and its disorders. *Nat. Hum. Behav.* **1**, 39 (2017).
- 14          46. P. Hoffman, J. L. McClelland, M. A. Lambon Ralph, Concepts, control, and context: A  
15          connectionist account of normal and disordered semantic cognition. *Psychol. Rev.* **125**,  
16          293–328 (2018).
- 17          47. A. Paivio, Dual coding theory: Retrospect and current status. *Can. J. Psychol. Can.*  
18          *Psychol.* **45**, 255–287 (1991).
- 19          48. N. Kriegeskorte, M. Mur, P. Bandettini, Representational similarity analysis - connecting  
20          the branches of systems neuroscience. *Front. Syst. Neurosci.* **2**, 4 (2008).
- 21          49. J. R. Binder, R. H. Desai, W. W. Graves, L. L. Conant, Where is the semantic system? A  
22          critical review and meta-analysis of 120 functional neuroimaging studies. *Cereb. Cortex*

- 1           **19**, 2767–2796 (2009).
- 2       50. M. Visser, E. Jefferies, M. A. L. Ralph, Semantic processing in the anterior temporal  
3       lobes: a meta-analysis of the functional neuroimaging literature. *J. Cogn. Neurosci.* **22**,  
4       1083–1094 (2010).
- 5       51. J. Wang, J. A. Conder, D. N. Blitzer, S. V Shinkareva, Neural representation of abstract  
6       and concrete concepts: a meta-analysis of neuroimaging studies. *Hum. Brain Mapp.* **31**,  
7       1459–1468 (2010).
- 8       52. R. S. Desikan, *et al.*, An automated labeling system for subdividing the human cerebral  
9       cortex on MRI scans into gyral based regions of interest. *Neuroimage* **31**, 968–980 (2006).
- 10      53. G. E. Rice, M. a. Lambon Ralph, P. Hoffman, The Roles of Left Versus Right Anterior  
11      Temporal Lobes in Conceptual Knowledge: An ALE Meta-analysis of 97 Functional  
12      Neuroimaging Studies. *Cereb. Cortex*, 1–18 (2015).
- 13      54. G. A. Miller, R. Beckwith, C. Fellbaum, D. Gross, K. J. Miller, Introduction to WordNet:  
14      An on-line lexical database. *Int. J. Lexicogr.* **3**, 235–244 (1990).
- 15      55. A. J. Anderson, B. Murphy, M. Poesio, Discriminating taxonomic categories and domains  
16      in mental simulations of concepts of varying concreteness. *J. Cogn. Neurosci.* **26**, 658–  
17      681 (2014).
- 18      56. T. Mikolov, K. Chen, G. Corrado, J. Dean, Efficient estimation of word representations in  
19      vector space in *1st International Conference on Learning Representations, ICLR 2013 -*  
20      *Workshop Track Proceedings*, (2013), pp. 1–12.
- 21      57. J. Pennington, R. Socher, C. D. Manning, GloVe: Global vectors for word representation  
22      in *Empirical Methods in Natural Language Processing (EMNLP)*, (2014), pp. 1532–1543.

- 1 58. K. McRae, G. S. Cree, M. S. Seidenberg, C. McNorgan, Semantic feature production  
2 norms for a large set of living and nonliving things. *Behav. Res. Methods* **37**, 547–559  
3 (2005).
- 4 59. G. S. Cree, B. C. Armstrong, “Computational Models of Semantic Memory” in *The*  
5 *Cambridge Handbook of Psycholinguistics*, M. J. Spivey, K. McRae, M. Joanisse, Eds.  
6 (Cambridge University Press, 2012), pp. 259–282.
- 7 60. E. M. Buchanan, K. D. Valentine, N. P. Maxwell, English semantic feature production  
8 norms: An extended database of 4436 concepts. *Behav. Res. Methods* **51**, 1849–1863  
9 (2019).
- 10 61. S. L. Fairhall, A. Caramazza, Brain Regions That Represent Amodal Conceptual  
11 Knowledge. *J. Neurosci.* **33**, 10552–10558 (2013).
- 12 62. A. G. Liuzzi, A. Aglinskas, S. L. Fairhall, General and feature-based semantic  
13 representations in the semantic network. *Sci. Rep.* **10**, 8931 (2020).
- 14 63. R. C. Oldfield, The assessment and analysis of handedness: the Edinburgh inventory.  
15 *Neuropsychologia* **9**, 97–113 (1971).
- 16 64. D. A. Balota, *et al.*, The English Lexicon Project. *Behav. Res. Methods* **39**, 445–459  
17 (2007).
- 18 65. R. W. Cox, AFNI: Software for analysis and visualization of functional magnetic  
19 resonance neuroimages. *Comput. Biomed. Res.* **29**, 162–173 (1996).
- 20 66. J. W. Peirce, PsychoPy-Psychophysics software in Python. *J. Neurosci. Methods* **162**, 8–  
21 13 (2007).
- 22
